# Supplementary material
Source: MDPI journal article supplement (https://www.mdpi.com/2077-1312/9/9/1018)
Supplement: s1 [file s1]

Supporting Information for

# Phylogenetic and phenogenetic diversity of *Synechococcus* along a Yellow Sea Section Reveal its Environmental Dependent Distribution and Co-occurrence Microbial Pattern

Ting Wang<sup>1,2,3,4,†</sup>, Xi Chen<sup>5,†</sup>, Song Qin<sup>1,6</sup>, Jialin Li<sup>1,6,\*</sup>

<sup>1</sup> Key Lab of Coastal Biology and Biological Resource Utilization, Yantai Institute of Coastal Zone Research, Chinese Academy of Sciences, Yantai 264003, China

<sup>2</sup> College of Environmental Science and Engineering, Ocean University of China, Qingdao 266100, China

<sup>3</sup> Institute of Deep-sea Science and Engineering, Chinese Academy of Sciences, Sanya 572000, China

<sup>4</sup> University of Chinese Academy of Sciences, Beijing, China

<sup>5</sup> College of Marine Life Science, Ocean University of China, Qingdao 266005, China

<sup>6</sup> Center for Ocean Mega-Science, Chinese Academy of Sciences, Qingdao 266071, China

\* Correspondence: jlli@yic.ac.cn

† Co-first authors

## Contents of this file

Figures S1 to S6

Tables S1 to S6

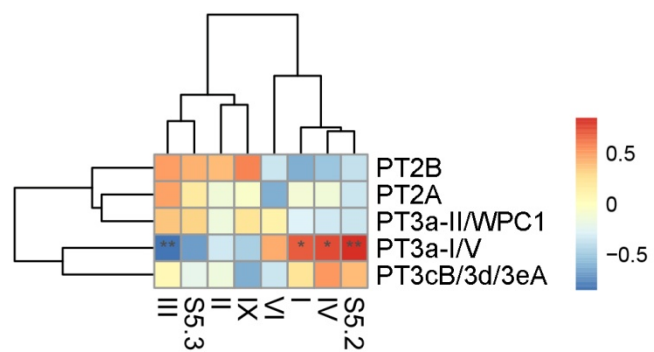

**Figure S1.** Spearman rank correlation analysis between *Synechococcus* clades as determined using *rpoC1* and pigment types as indirectly assessed using the *cpeBA* operon.

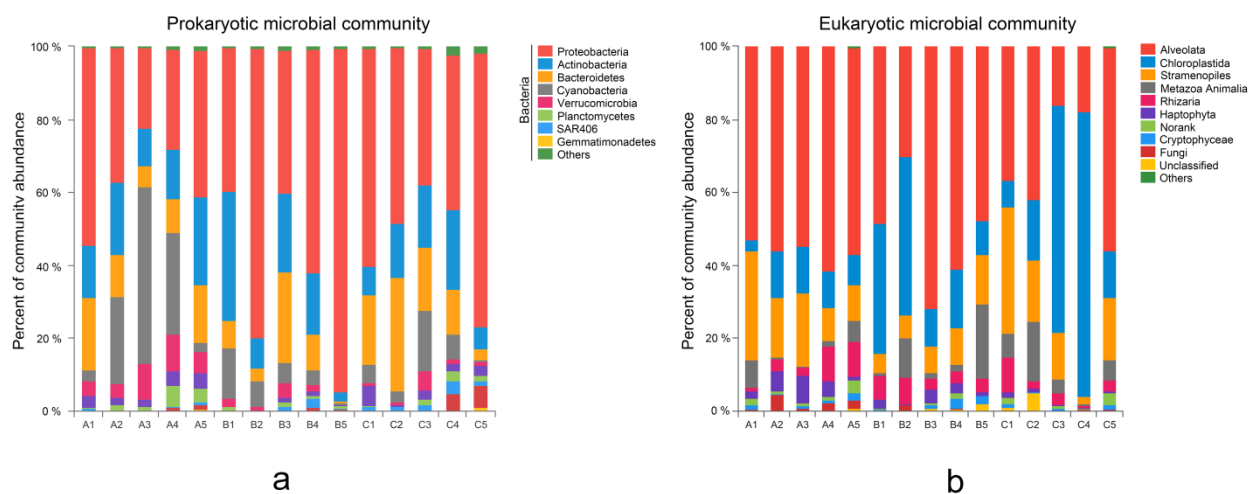

**Figure S2.** The relative abundances of predominant taxa in the prokaryotic community at the phylum level (a) and the eukaryotic community at the kingdom level (b).

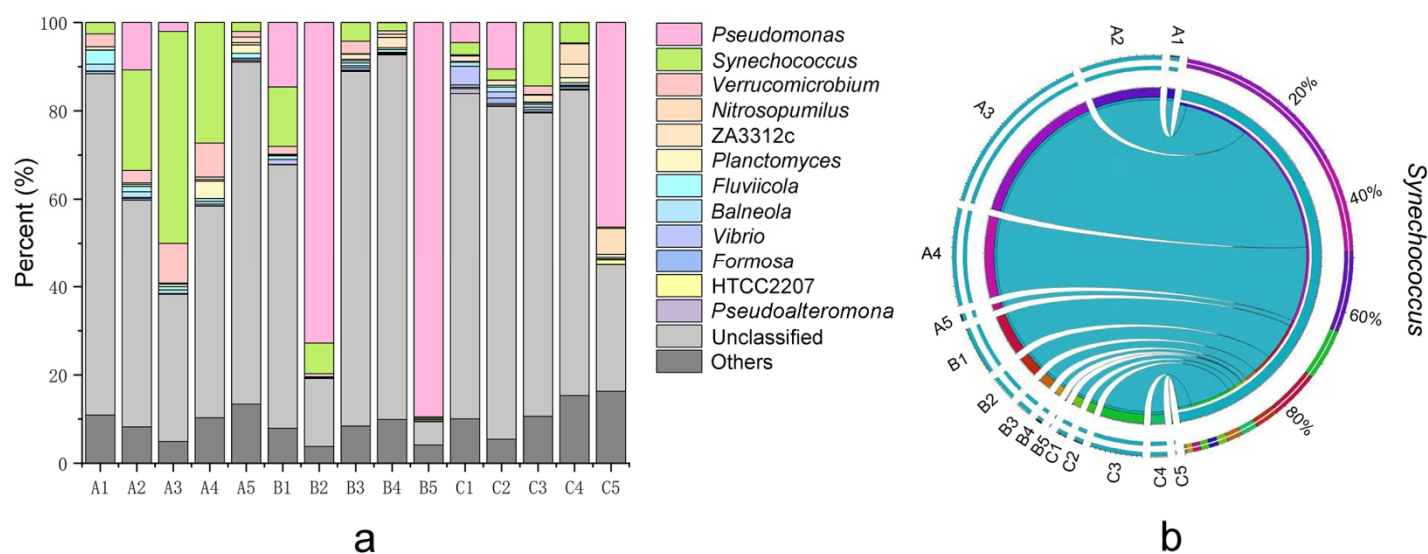

**Figure S3.** The relative abundance of taxa in the prokaryotic community at the genus level. **(a)** Community bar map showing the relative abundance of the genus; The unclassified does not represent a single taxon, but the sum of all taxa not classified to genus level; **(b)** Chord diagram reveals the relationship between samples and *Synechococcus* abundance. The length of the left semicircle represents the relative abundance of the *Synechococcus* in the corresponding samples. The right semicircle represents the distribution proportion of *Synechococcus* in different samples.

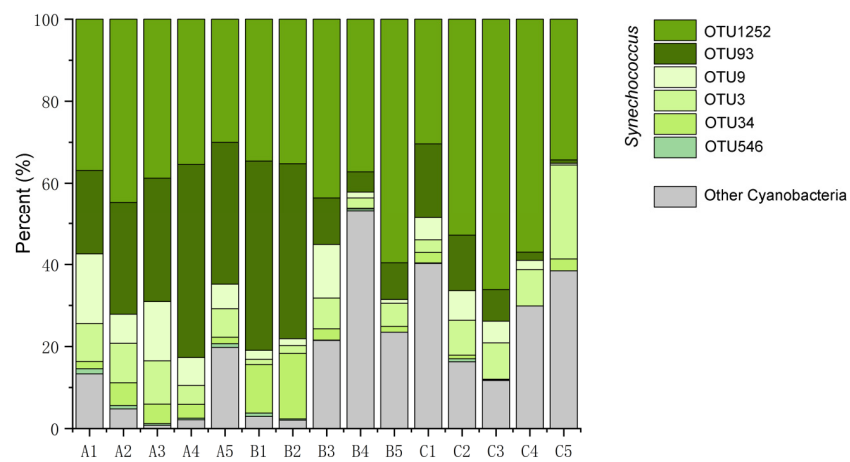

**Figure S4.** The relative abundances of OTUs belonging to phyla Cyanobacteria.

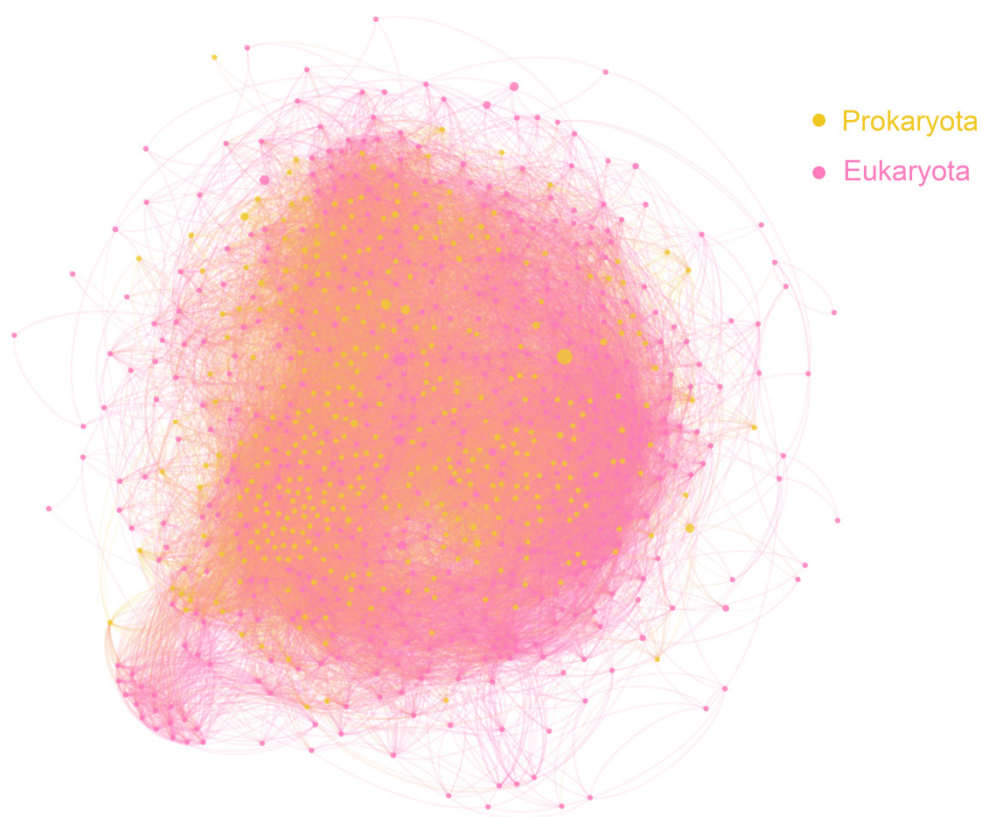

**Figure S5.** Network of microbial community encompassing all prokaryotic and eukaryotic OTUs constructed from the correlation matrix. OTUs with Spearman coefficients  $> 0.6$  and  $p < 0.05$  were connected and graphed using a force-directed layout algorithm.

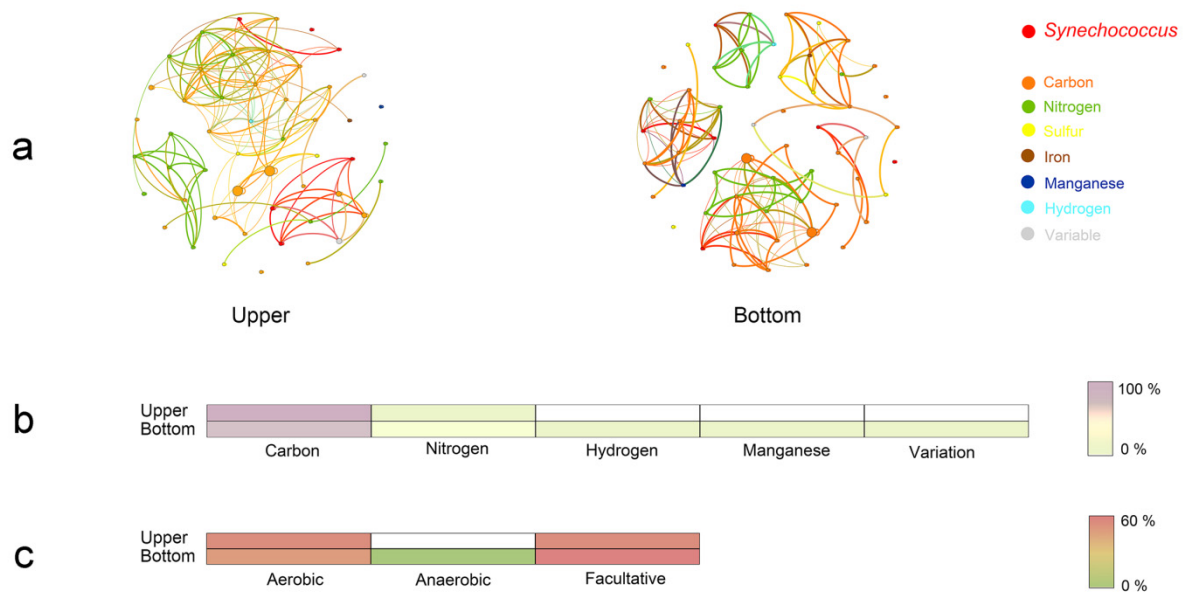

**Figure S6.** Network of microbial metabolic function correlations encompassing metabolic functions constructed from the correlation matrix of upper and bottom samples. **(a)** Metabolic functions with the absolute value of Spearman coefficients  $> 0.6$  and  $p < 0.05$  were connected and graphed using a force-directed layout algorithm. Red nodes represent six OTUs belonging to *Synechococcus*. **(b)** Metabolic heat map associated with *Synechococcus* showing the relative abundance of predominant metabolic functions classified based on the main metabolic elements. **(c)** Metabolic heat map associated with *Synechococcus* showing the relative abundance of predominant metabolic functions classified based on respiratory types.

**Table S1.** Reference sequences of *rpoC1* gene.

| Representative strain                             | Cluster | Clade | Accession number           |
|---------------------------------------------------|---------|-------|----------------------------|
| <i>Synechococcus</i> sp. CC9617                   | S5.1    | I     | AF154562.1                 |
| <i>Synechococcus</i> sp. PROS-9-1                 | S5.1    | I     | CP047961.1:1791816-1792218 |
| <i>Synechococcus</i> sp. SYN20                    | S5.1    | I     | CP047959.1:2224046-2224381 |
| <i>Synechococcus</i> sp. CC9311                   | S5.1    | I     | AF013607.1                 |
| <i>Synechococcus</i> sp. M16.1                    | S5.1    | II    | CP047954.1:1570118-1570520 |
| <i>Synechococcus</i> sp. RS9911                   | S5.1    | II    | AJ621009.1                 |
| <i>Synechococcus</i> sp. RS9907                   | S5.1    | II    | AJ621007.1                 |
| <i>Synechococcus</i> sp. WH6501                   | S5.1    | II    | AF448106.1                 |
| <i>Synechococcus</i> sp. Minos02                  | S5.1    | III   | AJ621016.1                 |
| <i>Synechococcus</i> sp. Minos12                  | S5.1    | III   | AJ621019.1                 |
| <i>Synechococcus</i> sp. RS9905                   | S5.1    | III   | AJ621006.1                 |
| <i>Synechococcus</i> sp. C129                     | S5.1    | III   | AF153339.1                 |
| <i>Synechococcus</i> sp. CC9703                   | S5.1    | III   | AF153338.1                 |
| <i>Synechococcus</i> sp. CC9902                   | S5.1    | IV    | CP000097.1:614302-614704   |
| <i>Synechococcus</i> sp. RS9901                   | S5.1    | IX    | AJ621003.1                 |
| <i>Synechococcus</i> sp. UW01                     | S5.1    | V     | AJ621020.1                 |
| <i>Synechococcus</i> sp. WH8018                   | S5.1    | VI    | AJ621015.1                 |
| <i>Synechococcus</i> sp. WH7805                   | S5.1    | VI    | L34062.1                   |
| <i>Synechococcus</i> sp. RS9920                   | S5.1    | VII   | AJ621012.1                 |
| <i>Synechococcus</i> sp. KORDI-49                 | S5.1    | WPC1  | CP006270.1:928342-928744   |
| <i>Synechococcus</i> sp. A15-127                  | S5.1    | WPC1  | CP047948.1:1883957-1884359 |
| <i>Synechococcus</i> sp. WH8007                   | S5.2    | CB5   | AF448107.1                 |
| <i>Synechococcus</i> sp. Minos11                  | S5.3    |       | AJ621021.1                 |
| <i>Synechococcus</i> sp. Minos01                  | S5.3    |       | AJ621022.1                 |
| <b>Outgroup-<i>Escherichia coli</i> sp. U5/41</b> |         |       | NR024570.1                 |



**Table S2.** Reference sequences of *cpeBA* operon.

| Representative strain                       | Cluster | Clade | Pigment type | Accession number |
|---------------------------------------------|---------|-------|--------------|------------------|
| <i>Synechococcus</i> sp. BMK-MC-1           | S5.1    | V     | 2A           | KF528784.1       |
| <i>Synechococcus</i> sp. G10.1              | S5.2    |       | 2B           | DQ248025.1       |
| <i>Synechococcus</i> sp. A15-44             | S5.1    | II    | 2B           | KF528782.1       |
| <i>Synechococcus</i> sp. PROS-7-1           | S5.1    | VI    | 2B           | KF528783.1       |
| <i>Synechococcus</i> sp. G11                | S5.2    |       | 2B           | DQ248026.1       |
| <i>Synechococcus</i> sp. M12.1              | S5.1    | II    | 2B           | JN566232.1       |
| <i>Synechococcus</i> sp. M16.1              | S5.1    | II    | 3a           | KF528774.1       |
| <i>Synechococcus</i> sp. M16B.1             | S5.1    | II    | 3a           | JN566234.1       |
| <i>Synechococcus</i> sp. ROS8604            | S5.1    | I     | 3a           | KF528765.1       |
| <i>Synechococcus</i> sp. SYN20              | S5.1    | I     | 3a           | MG018776.1       |
| <i>Synechococcus</i> sp. WH7803             | S5.1    | V     | 3a           | X72961.1         |
| <i>Synechococcus</i> sp. RS9907             | S5.1    | II    | 3a           | KF528775.1       |
| <i>Synechococcus</i> sp. NOUM97013          | S5.1    | VII   | 3a           | KF528781.1       |
| <i>Synechococcus</i> sp. M16.3              | S5.1    | II    | 3a           | JN566233.1       |
| <i>Synechococcus</i> sp. KORDI-49           | S5.1    | WPC1  | 3a           | CP006270.1       |
| <i>Synechococcus</i> sp. RCC307             | S5.3    |       | 3b/ 3e       | CT978603.1       |
| <i>Synechococcus</i> sp. BIOS-E4-1          | S5.1    | CRD1  | 3cB          | KF528767.1       |
| <i>Synechococcus</i> sp. MITS9920           | S5.1    | CRD1  | 3d           | MG018774.1       |
| <i>Synechococcus</i> sp. CC9902             | S5.1    | IV    | 3d           | CP000097.1       |
| <i>Synechococcus</i> sp. BIOS-U3-1          | S5.1    | CRD1  | 3dA          | KF528768.1       |
| Outgroup- <i>Escherichia coli</i> sp. U5/41 |         |       |              | NR024570.1       |

**Table S3.** Spearman correlation coefficients between environmental variables.

|                                    | Longit<br>ude | Water<br>depth | Sampling<br>depth | Tempera<br>ture | Salin<br>ity | Oxyg<br>en | NO <sub>2</sub> <sup>-</sup> | NO <sub>3</sub> <sup>-</sup> | NH <sub>4</sub> <sup>+</sup> | DT<br>N    | PO <sub>4</sub> <sup>3-</sup> | DT<br>P     | DSi         |
|------------------------------------|---------------|----------------|-------------------|-----------------|--------------|------------|------------------------------|------------------------------|------------------------------|------------|-------------------------------|-------------|-------------|
| <b>Longitude</b>                   | 1             | 0.99**         | 0.23              | -0.47           | 0.59*        | 0.89**     | -0.3<br>2                    | 0.1<br>1                     | 0.14                         | -0.1<br>9  | 0.16                          | 0.25        | -0.1<br>9   |
| <b>Water<br/>depth</b>             | 0.99**        | 1              | 0.23              | -0.47           | 0.59*        | 0.89**     | -0.3<br>2                    | 0.1<br>1                     | 0.14                         | -0.1<br>9  | 0.16                          | 0.25        | -0.1<br>9   |
| <b>Sampling<br/>depth</b>          | 0.23          | 0.23           | 1                 | -0.91**         | 0.82**       | 0.10       | 0.5<br>1                     | 0.4<br>0                     | -0.7<br>3**                  | 0.5<br>0   | 0.72<br>**                    | 0.85<br>**  | 0.77<br>**  |
| <b>Temperatu<br/>re</b>            | -0.47         | -0.47          | -0.91**           | 1               | -0.87**      | -0.28      | -0.4<br>8                    | -0.5<br>2*                   | 0.67<br>**                   | -0.4<br>0  | -0.8<br>1**                   | -0.8<br>9** | -0.6<br>8** |
| <b>Salinity</b>                    | 0.59*         | 0.59*          | 0.82**            | -0.87**         | 1            | 0.43       | 0.1<br>5                     | 0.2<br>0                     | -0.5<br>6*                   | 0.4<br>0   | 0.66<br>**                    | 0.84<br>**  | 0.42        |
| <b>Oxygen</b>                      | 0.89**        | 0.89**         | 0.10              | -0.28           | 0.43         | 1          | -0.5<br>2*                   | -0.2<br>0                    | 0.15                         | -0.3<br>7  | -0.0<br>7                     | 0.04        | -0.3<br>1   |
| <b>NO<sub>2</sub><sup>-</sup></b>  | -0.32         | -0.32          | 0.51              | -0.48           | 0.15         | -0.52*     | 1<br>7**                     | 0.6<br>0                     | -0.5<br>0                    | 0.3<br>5   | 0.57<br>*                     | 0.42        | 0.73<br>**  |
| <b>NO<sub>3</sub><sup>-</sup></b>  | 0.11          | 0.11           | 0.40              | -0.52*          | 0.20         | -0.20      | 0.6<br>7**                   | 1                            | -0.1<br>1                    | 0.2<br>1   | 0.63<br>*                     | 0.40        | 0.63<br>*   |
| <b>NH<sub>4</sub><sup>+</sup></b>  | 0.14          | 0.14           | -0.73**           | 0.67**          | -0.56*       | 0.15       | -0.5<br>0                    | -0.1<br>1                    | 1                            | -0.4<br>0  | -0.6<br>2*                    | -0.7<br>4** | -0.7<br>4** |
| <b>DTN</b>                         | -0.19         | -0.19          | 0.50              | -0.40           | 0.40         | -0.37      | 0.3<br>5                     | 0.2<br>1                     | -0.4<br>0                    | 1          | 0.66<br>**                    | 0.72<br>**  | 0.50        |
| <b>PO<sub>4</sub><sup>3-</sup></b> | 0.16          | 0.16           | 0.72**            | -0.81**         | 0.66**       | -0.07      | 0.5<br>7*                    | 0.6<br>3*                    | -0.6<br>2*                   | 0.6<br>6** | 1                             | 0.92<br>**  | 0.76<br>**  |
| <b>DTP</b>                         | 0.25          | 0.25           | 0.85**            | -0.89**         | 0.84**       | 0.04       | 0.4<br>2                     | 0.4<br>0                     | -0.7<br>4**                  | 0.7<br>2** | 0.92<br>**                    | 1           | 0.72<br>**  |
| <b>DSi</b>                         | -0.19         | -0.19          | 0.77**            | -0.68**         | 0.42         | -0.31      | 0.7<br>3**                   | 0.6<br>3*                    | -0.7<br>4**                  | 0.5<br>0   | 0.76<br>**                    | 0.72<br>**  | 1           |

\*\*\*" represents  $p < 0.01$ ; "\*\*" represents  $p < 0.05$

**Table S4.** Sequencing information and alpha diversity indices of *rpoC1* and *cpeBA* gene.

| Samples | <i>rpoC1</i> gene   |          |            |       | <i>cpeBA</i> operpn |          |            |       |
|---------|---------------------|----------|------------|-------|---------------------|----------|------------|-------|
|         | Number of sequences | Coverage | NP-Shannon | Chao1 | Number of sequences | Coverage | NP-Shannon | Chao1 |
| A1      | 21898               | 0.99     | 1.75       | 85    | 34                  | 0.82     | 2.28       | 19    |
| A2      | 21998               | 0.99     | 1.60       | 66    | 1                   | 0        | 0          | 1     |
| A3      | 13737               | 0.99     | 1.46       | 60    | 36                  | 0.99     | 1.82       | 7     |
| A4      | 9747                | 0.99     | 1.81       | 78    | /                   | /        | /          | /     |
| A5      | 11031               | 0.99     | 2.09       | 84    | 119                 | 0.97     | 1.78       | 14    |
| B1      | 12988               | 0.99     | 1.79       | 61    | 38                  | 0.92     | 1.75       | 10    |
| B2      | 13527               | 0.99     | 2.09       | 63    | 31                  | 0.81     | 2.18       | 25    |
| B3      | 14730               | 0.99     | 2.40       | 95    | 25                  | 0.84     | 2.18       | 11    |
| B4      | 20763               | 0.99     | 1.64       | 89    | 44                  | 0.86     | 2.41       | 21    |
| B5      | 3458                | 0.99     | 1.87       | 64    | /                   | /        | /          | /     |
| C1      | 21211               | 0.99     | 1.52       | 88    | 30                  | 0.97     | 1.57       | 6     |
| C2      | 19162               | 0.99     | 2.30       | 87    | 51                  | 0.98     | 1.76       | 7     |
| C3      | 15257               | 0.99     | 2.07       | 69    | 31                  | 0.84     | 2          | 19    |
| C4      | 16570               | 0.99     | 1.90       | 80    | 31                  | 0.97     | 1.59       | 6     |
| C5      | /                   | /        | /          | /     | 26                  | 0.73     | 2.57       | 17    |

“/” represents representative clone library of this sample was unsuccessful.

**Table S5.** Sequencing information and alpha diversity indices of 16S and 18S gene.

| Samples | 16S gene            |          |            |       | 18S gene            |          |            |       |
|---------|---------------------|----------|------------|-------|---------------------|----------|------------|-------|
|         | Number of sequences | Coverage | NP-Shannon | Chao1 | Number of sequences | Coverage | NP-Shannon | Chao1 |
| A1      | 59596               | 0.99     | 4.19       | 731   | 66257               | 0.99     | 3.55       | 600   |
| A2      | 50565               | 0.99     | 4.08       | 597   | 70836               | 0.99     | 3.78       | 442   |
| A3      | 68369               | 0.99     | 3.45       | 673   | 48965               | 0.99     | 3.81       | 600   |
| A4      | 71235               | 0.99     | 4.28       | 1102  | 47679               | 0.99     | 4.16       | 795   |
| A5      | 60001               | 0.99     | 4.51       | 1083  | 51777               | 0.99     | 4.65       | 449   |
| B1      | 49932               | 0.99     | 3.48       | 470   | 72661               | 0.99     | 3.22       | 264   |
| B2      | 50960               | 0.99     | 2.02       | 381   | 36802               | 0.99     | 3.06       | 108   |
| B3      | 47704               | 0.99     | 4.19       | 914   | 65422               | 0.99     | 3.82       | 535   |
| B4      | 40938               | 0.99     | 3.72       | 804   | 61141               | 0.99     | 4.33       | 651   |
| B5      | 55793               | 0.99     | 1.38       | 471   | 79711               | 0.99     | 3.68       | 110   |
| C1      | 49515               | 0.99     | 4.30       | 725   | 51156               | 0.99     | 4.05       | 657   |
| C2      | 60950               | 0.99     | 4.01       | 653   | 42940               | 0.99     | 3.62       | 445   |
| C3      | 70528               | 0.99     | 4.22       | 907   | 40305               | 0.99     | 2.71       | 567   |
| C4      | 52073               | 0.99     | 4.18       | 869   | 54969               | 0.99     | 1.92       | 391   |
| C5      | 52162               | 0.99     | 3.47       | 735   | 60206               | 0.99     | 4.39       | 373   |

**Table S6.** Correlative eukaryotic taxa of *Synechococcus* as potential *in-situ* grazers in the ecosystem.

| Taxa                                                                                                                                                                   | Abundance (%) |
|------------------------------------------------------------------------------------------------------------------------------------------------------------------------|---------------|
| Eukaryota   Alveolata   Ciliophora   Intramacronucleata   Spirotrichea   Choreotrichia   <i>Eutintinnus</i> ;   <i>Eutintinnus_sp._ENB99</i>   OTU375                  | 0.01591       |
| Eukaryota   Alveolata   Ciliophora   Intramacronucleata   Spirotrichea   Choreotrichia   norank_Choreotrichia   <i>Leegaardiella_sp._LS803</i>   OTU601                | 0.02812       |
| Eukaryota   Alveolata   Ciliophora   Intramacronucleata   Spirotrichea   Choreotrichia   norank_Choreotrichia   OTU374                                                 | 0.04184       |
| Eukaryota   Alveolata   Ciliophora   Intramacronucleata   Spirotrichea   Choreotrichia   <i>Pelagostrobilidium</i>   unclassified_ <i>Pelagostrobilidium</i>   OTU1354 | 0.0161        |
| Eukaryota   Alveolata   Ciliophora   Intramacronucleata   Spirotrichea   Choreotrichia   <i>Pelagostrobilidium</i>   uncultured_ <i>Pelagostrobilidium</i>   OTU13     | 0.13142       |
| Eukaryota   Alveolata   Ciliophora   Intramacronucleata   Spirotrichea   Choreotrichia   <i>Pelagostrobilidium</i>   uncultured_ <i>Pelagostrobilidium</i>   OTU593    | 0.06527       |
| Eukaryota   Alveolata   Ciliophora   Intramacronucleata   Spirotrichea   Choreotrichia   <i>Steenstrupiella</i>   <i>Amphorellopsis_sp.</i>   OTU507                   | 0.03821       |
| Eukaryota   Alveolata   Ciliophora   Intramacronucleata   Spirotrichea   norank_Spirotrichea   OTU93                                                                   | 0.06307       |
| Eukaryota   Alveolata   Ciliophora   Intramacronucleata   Spirotrichea   Oligotrichia   norank_Oligotrichia   OTU87                                                    | 0.024         |
| Eukaryota   Alveolata   Ciliophora   Intramacronucleata   Spirotrichea   Oligotrichia   <i>Spirotontonia</i>   uncultured_ <i>Spirotontonia</i>   OTU61                | 0.3174        |
| Eukaryota   Alveolata   Dinoflagellata   Dinophyceae   Gymnodiniphycidae   Gymnodinium_clade   <i>Erythrospidinium</i>   uncultured_ <i>Erythrospidinium</i>   OTU7    | 0.51183       |
| Eukaryota   Alveolata   Dinoflagellata   Dinophyceae   Gymnodiniphycidae   Gymnodinium_clade   <i>Gymnodinium</i>   <i>Gymnodinium_impudicum</i>   OTU590              | 0.04797       |
| Eukaryota   Alveolata   Dinoflagellata   Dinophyceae   Gymnodiniphycidae   Gymnodinium_clade   <i>Polykrikos</i>   <i>Polykrikos_kofoidii</i> ; OTU911                 | 0.01148       |
| Eukaryota   Alveolata   Dinoflagellata   Dinophyceae   Gymnodiniphycidae   Gymnodinium_clade   <i>Proterothropsis</i>   uncultured_ <i>Proterothropsis</i>   OTU486    | 0.44891       |
| Eukaryota   Alveolata   Dinoflagellata   Dinophyceae   Gymnodiniphycidae   Gymnodinium_clade   unclassified_ <i>Gymnodinium_clade</i>   OTU616                         | 0.21283       |
| Eukaryota   Alveolata   Dinoflagellata   Dinophyceae   Gymnodiniphycidae   Kareniaceae   <i>Karlodinium</i>   unclassified_ <i>Karlodinium</i>   OTU266                | 0.0333        |
| Eukaryota   Alveolata   Dinoflagellata   Dinophyceae   Gymnodiniphycidae   norank_Gymnodiniphycidae   <i>Akashiwo_sanguinea</i>   OTU496                               | 0.01883       |
| Eukaryota   Alveolata   Dinoflagellata   Dinophyceae   norank_Dinophyceae   OTU488                                                                                     | 0.01468       |
| Eukaryota   Alveolata   Dinoflagellata   Dinophyceae   Peridiniphycidae   Gonyaulacales   <i>Alexandrium</i>   <i>Alexandrium_hiranoi</i>   OTU1440                    | 0.03857       |
| Eukaryota   Alveolata   Dinoflagellata   Dinophyceae   Peridiniphycidae   Gonyaulacales   <i>Azadinium</i>   unclassified_ <i>Azadinium</i>   OTU953                   | 0.32408       |

|                                                                                                                                                       |         |
|-------------------------------------------------------------------------------------------------------------------------------------------------------|---------|
| Eukaryota Alveolata Dinoflagellata Dinophyceae Peridiniphycidae Gonyaulacales  <i>Fragilidium</i> ; <i>Fragilidium</i> _sp._CCMP1920 OTU604           | 0.03985 |
| Eukaryota Alveolata Dinoflagellata Dinophyceae Peridiniphycidae Gonyaulacales  <i>Fragilidium</i>   <i>Fragilidium</i> _sp._G02 OTU441                | 0.04048 |
| Eukaryota Alveolata Dinoflagellata Dinophyceae Peridiniphycidae Gonyaulacales  <i>Grammatodinium</i>   <i>Grammatodinium_tongyeonginum</i>  OTU631    | 0.04437 |
| Eukaryota Alveolata Dinoflagellata Dinophyceae Peridiniphycidae Gonyaulacales  <i>Protoceratium</i>  unclassified_ <i>Protoceratium</i>  OTU554       | 0.02084 |
| Eukaryota Alveolata Dinoflagellata Dinophyceae unclassified_Dinophyceae OTU1016                                                                       | 0.13246 |
| Eukaryota Alveolata Dinoflagellata Dinophyceae unclassified_Dinophyceae OTU1389                                                                       | 0.01622 |
| Eukaryota Alveolata Dinoflagellata Dinophyceae unclassified_Dinophyceae OTU510                                                                        | 0.0112  |
| Eukaryota Alveolata Protalveolata Syndiniales norank_Syndiniales  <i>Amoebophrya</i>   <i>Amoebophrya</i> _sp._ex_ <i>Prorocentrum_micans</i>  OTU313 | 0.0269  |
| Eukaryota Alveolata Protalveolata Syndiniales norank_Syndiniales  <i>Amoebophrya</i>  uncultured_ <i>Amoebophrya</i>  OTU954                          | 0.16686 |
| Eukaryota Alveolata Protalveolata Syndiniales norank_Syndiniales norank_Syndiniales  <i>Amoebophrya</i>  uncultured_ <i>Amoebophrya</i>  OTU594       | 0.01339 |
| Eukaryota Alveolata Protalveolata Syndiniales norank_Syndiniales norank_Syndiniales  <i>Amoebophrya</i>  uncultured_ <i>Amoebophrya</i>  OTU321       | 0.02674 |
| Eukaryota Alveolata Protalveolata Syndiniales norank_Syndiniales norank_Syndiniales  <i>Amoebophrya</i>  uncultured_ <i>Amoebophrya</i>  OTU569       | 0.01162 |
| Eukaryota Alveolata Protalveolata Syndiniales norank_Syndiniales norank_Syndiniales  <i>Duboscquella</i>  unclassified_ <i>Duboscquella</i>  OTU468   | 0.7203  |
| Eukaryota Alveolata Protalveolata Syndiniales norank_Syndiniales norank_Syndiniales  <i>Duboscquella</i>  unclassified_ <i>Duboscquella</i>  OTU539   | 0.1066  |
| Eukaryota Alveolata Protalveolata Syndiniales norank_Syndiniales norank_Syndiniales  <i>Hematodinium</i>  unclassified_ <i>Hematodinium</i>  OTU1340  | 0.01582 |
| Eukaryota Alveolata Protalveolata Syndiniales norank_Syndiniales norank_Syndiniales OTU337                                                            | 0.02441 |
| Eukaryota Alveolata Protalveolata Syndiniales norank_Syndiniales Syndiniales_Group_I OTU856                                                           | 0.01974 |
| Eukaryota Alveolata Protalveolata Syndiniales norank_Syndiniales Syndiniales_Group_I OTU121                                                           | 0.13179 |
| Eukaryota Alveolata Protalveolata Syndiniales norank_Syndiniales Syndiniales_Group_I OTU512                                                           | 0.14938 |
| Eukaryota Alveolata Protalveolata Syndiniales norank_Syndiniales Syndiniales_Group_I OTU115                                                           | 0.15289 |
| Eukaryota Alveolata Protalveolata Syndiniales norank_Syndiniales Syndiniales_Group_II OTU1266                                                         | 0.01684 |
| Eukaryota Alveolata Protalveolata Syndiniales norank_Syndiniales Syndiniales_Group_II OTU308                                                          | 0.13674 |
| Eukaryota Alveolata Protalveolata Syndiniales norank_Syndiniales Syndiniales_Group_II OTU914                                                          | 0.0268  |
| Eukaryota Alveolata Protalveolata Syndiniales norank_Syndiniales Syndiniales_Group_II OTU311                                                          | 0.23895 |

|                                                                                                                                                                              |         |
|------------------------------------------------------------------------------------------------------------------------------------------------------------------------------|---------|
| Eukaryota Alveolata Protalveolata Syndiniales norank_Syndiniales Syndiniales_Group_II OTU905                                                                                 | 0.10414 |
| Eukaryota Alveolata Protalveolata Syndiniales norank_Syndiniales Syndiniales_Group_II OTU306                                                                                 | 0.27925 |
| Eukaryota Chloroplastida norank_Chloroplastida Chlorophyceae norank_Chlorophyceae OTU987                                                                                     | 0.01915 |
| Eukaryota Chloroplastida norank_Chloroplastida Clade_VII Subclade_B  <i>prasinophyte_sp._RCC2339_clade_VIIB2</i>  OTU998                                                     | 4.94312 |
| Eukaryota Chloroplastida norank_Chloroplastida Mamiellophyceae Mamiellales norank_Mamiellales  <i>Micromonas</i>   <i>Micromonas_pusilla</i>  OTU936                         | 0.17986 |
| Eukaryota Chloroplastida norank_Chloroplastida Mamiellophyceae norank_Mamiellophyceae  <i>Dolichomastix</i>   <i>Dolichomastix_tenuilepis</i>  OTU3                          | 0.01197 |
| Eukaryota Chloroplastida norank_Chloroplastida Mamiellophyceae norank_Mamiellophyceae  <i>Dolichomastix</i>   <i>Dolichomastix_tenuilepis</i>  OTU500                        | 0.04835 |
| Eukaryota Chloroplastida norank_Chloroplastida Prasinophytae norank_Prasinophytae  <i>Pycnococcus_sp._MBIC10637</i>  OTU1455                                                 | 0.84871 |
| Eukaryota Chloroplastida norank_Chloroplastida Prasinophytae Pseudoscourfieldiales norank_Pseudoscourfieldiales  <i>Pycnococcus</i>   <i>Pycnococcus_prova solii</i>  OTU724 | 0.79777 |
| Eukaryota Chloroplastida norank_Chloroplastida Prasinophytae Pyramimonadales norank_Pyramimonadales  <i>Prasinopapilla</i>   <i>Prasinopapilla_vacuolata</i>  OTU276         | 0.03859 |
| Eukaryota Chloroplastida norank_Chloroplastida Prasinophytae unclassified_Prasinophytae OTU1521                                                                              | 0.01075 |
| Eukaryota Chloroplastida norank_Chloroplastida Trebouxiophyceae norank_Trebouxiophyceae OTU380                                                                               | 1.35874 |
| Eukaryota Cryptophyceae norank_Cryptophyceae OTU546                                                                                                                          | 0.01525 |
| Eukaryota Fungi Chytridiomycota norank_Chytridiomycota OTU440                                                                                                                | 0.13878 |
| Eukaryota Haptophyta Prymnesiophyceae Coccolithales norank_Coccolithales  <i>Tergestiella</i>   <i>Tergestiella_adriatica</i>  OTU708                                        | 0.01196 |
| Eukaryota Haptophyta Prymnesiophyceae Coccolithales norank_Coccolithales  OTU47                                                                                              | 1.27162 |
| Eukaryota Haptophyta unclassified_Haptophyta OTU1031                                                                                                                         | 0.11061 |
| Eukaryota Metazoa_Animalia Annelida Polychaeta Phyllodocida norank_Phyllodocida  <i>Sigambra_sp._BC-2003</i>  OTU50                                                          | 0.01991 |
| Eukaryota Metazoa_Animalia Arthropoda Maxillopoda Calanoida norank_Calanoida  <i>Calanus_helgolandicus</i>  OTU1411                                                          | 0.54853 |
| Eukaryota Metazoa_Animalia Arthropoda Maxillopoda Cyclopoida norank_Cyclopoida OTU827                                                                                        | 0.30057 |
| Eukaryota Metazoa_Animalia Ctenophora norank_Ctenophora  <i>Euplokamis_sp._SM-2011a</i>  OTU775                                                                              | 0.25165 |
| Eukaryota Metazoa_Animalia Vertebrata norank_Vertebrata  <i>Tursiops_truncatus_bottlenose_dolphin</i>  OTU988                                                                | 0.58293 |
| Eukaryota norank norank_Eukaryota OTU548                                                                                                                                     | 0.01988 |

|                                                                                                                                                        |         |
|--------------------------------------------------------------------------------------------------------------------------------------------------------|---------|
| Eukaryota norank norank_Eukaryota OTU641                                                                                                               | 0.02974 |
| Eukaryota norank Picozoa Picomonadida norank_Picomonadida OTU1369                                                                                      | 0.01966 |
| Eukaryota norank Picozoa Picomonadida Picomonadidae norank_Picomonadidae  <i>Picomonas</i>  OTU296                                                     | 0.0175  |
| Eukaryota Rhizaria Cercozoa Chlorarachniophyta norank_Chlorarachniophyta  <i>Lotharella</i>   <i>Chlorarachniophyceae</i> _sp._RCC531 OTU461           | 0.01228 |
| Eukaryota Rhizaria Cercozoa Chlorarachniophyta norank_Chlorarachniophyta norank_Chlorarachniophyta  <i>Minorisa</i>  OTU1015                           | 0.05346 |
| Eukaryota Rhizaria Cercozoa Imbricatea Silicofilosea Euglyphida  <i>Paulinella</i>  OTU466                                                             | 0.03602 |
| Eukaryota Rhizaria Cercozoa Novel_Clade_2 norank_Novel_Clade_2 OTU632                                                                                  | 0.03383 |
| Eukaryota Rhizaria Cercozoa Thecofilosea Ebriacea norank_Ebriacea  <i>Ebria</i>  OTU505                                                                | 0.06734 |
| Eukaryota Rhizaria Cercozoa Thecofilosea Ebriacea norank_Ebriacea  <i>Ebria</i>  OTU16                                                                 | 0.04895 |
| Eukaryota Rhizaria Cercozoa Thecofilosea norank_Thecofilosea OTU1028                                                                                   | 0.98223 |
| Eukaryota Rhizaria Cercozoa Thecofilosea unclassified_Thecofilosea OTU443                                                                              | 0.03384 |
| Eukaryota Rhizaria Cercozoa unclassified_Cercozoa OTU610                                                                                               | 0.05437 |
| Eukaryota Rhizaria Retaria Polycystinea Nassellaria norank_Nassellaria  <i>Pseudocubus</i>   <i>Lithomelissa_setosa</i>  OTU943                        | 0.15101 |
| Eukaryota Stramenopiles Bicosoecida norank_Bicosoecida  <i>Bicosoeca</i>   <i>Bicosoeca_vacillans</i>  OTU1137                                         | 0.01834 |
| Eukaryota Stramenopiles Labyrinthulomycetes norank_Labyrinthulomycetes OTU1356                                                                         | 0.02142 |
| Eukaryota Stramenopiles MAST-1 MAST-1A norank_MAST-1A OTU1320                                                                                          | 0.08885 |
| Eukaryota Stramenopiles MAST-11 norank_MAST-11 OTU1160                                                                                                 | 0.01682 |
| Eukaryota Stramenopiles MAST-2 norank_MAST-2 OTU1036                                                                                                   | 0.02449 |
| Eukaryota Stramenopiles MAST-3 MAST-3B norank_MAST-3B OTU560                                                                                           | 0.02812 |
| Eukaryota Stramenopiles MAST-3 MAST-3C norank_MAST-3C OTU1527                                                                                          | 0.02896 |
| Eukaryota Stramenopiles MAST-3 MAST-3F norank_MAST-3F OTU1120                                                                                          | 0.0127  |
| Eukaryota Stramenopiles MAST-3 MAST-3J norank_MAST-3J norank_MAST-3J OTU34                                                                             | 0.03399 |
| Eukaryota Stramenopiles Ochrophyta Chrysophyceae Ochromonadales norank_Ochromonadales  <i>Paraphysomonas</i>  uncultured_ <i>Paraphysomonas</i>  OTU33 | 0.0284  |
| Eukaryota Stramenopiles Ochrophyta Chrysophyceae unclassified_Chrysophyceae OTU568                                                                     | 0.01472 |



|                                                                                                                                                                                  |         |
|----------------------------------------------------------------------------------------------------------------------------------------------------------------------------------|---------|
| Eukaryota   Stramenopiles   Ochrophyta   Diatomea   Bacillariophytina   Mediophyceae   <i>Brockmanniella</i>   <i>Brockmanniella_brockmannii</i>   OTU1361                       | 0.01665 |
| Eukaryota   Stramenopiles   Ochrophyta   Diatomea   Bacillariophytina   Mediophyceae   <i>Chaetoceros</i>   <i>Chaetoceros_muellerii</i>   OTU60                                 | 0.07502 |
| Eukaryota   Stramenopiles   Ochrophyta   Diatomea   Bacillariophytina   Mediophyceae   <i>Chaetoceros</i>   <i>Peridinium_quinquecorne_endosymbiont</i>   OTU1488                | 0.3701  |
| Eukaryota   Stramenopiles   Ochrophyta   Diatomea   Bacillariophytina   Mediophyceae   <i>Thalassiosira</i>   <i>Thalassiosira_profunda</i>   OTU250                             | 0.02194 |
| Eukaryota   Stramenopiles   Ochrophyta   Dictyochophyceae   Dictyochales   norank_Dictyochales   <i>Dictyocha</i>   <i>uncultured_Dictyocha</i>   OTU44                          | 3.57247 |
| Eukaryota   Stramenopiles   Ochrophyta   Dictyochophyceae   Florenciellales   norank_Florenciellales   <i>Pseudochattonella</i>   <i>Pseudochattonella_verruculosa</i>   OTU1463 | 0.14578 |
| Eukaryota   Stramenopiles   Ochrophyta   Eustigmatophyceae   Eustigmatales   norank_Eustigmatales   OTU520                                                                       | 0.57533 |
| Eukaryota   Stramenopiles   Peronosporomycetes   norank_Peronosporomycetes   OTU417                                                                                              | 0.25777 |
| Eukaryota   Stramenopiles   Peronosporomycetes   norank_Peronosporomycetes   OTU990                                                                                              | 0.34125 |
| Eukaryota   Stramenopiles   unclassified_Stramenopiles   OTU491                                                                                                                  | 0.01412 |
| Eukaryota   unclassified_Eukaryota   OTU996                                                                                                                                      | 0.01138 |
